# Supplementary material
Source: HighWire-hosted journal article supplement (https://ajnr-sso.highwirestaging.com/highwire/filestream/106067/field_highwire_adjunct_files/0/0913.pdf)
Supplement: 0913.pdf [file 0913.pdf]

**Supplementary Table 1:** Demographic, clinical, pathology, and molecular features of pediatric PLNTY cases

| Case | Age at presentation of symptoms | Age at first MRI | Sex | Time between initial MRI and surgery (months) | Duration of symptoms prior to surgery (months) | Symptoms           | Type of seizures       | Recurrence of seizures after surgery | Calcifications on pathology | Cortical dysplasia on pathology | MAP kinase pathway activation |
|------|---------------------------------|------------------|-----|-----------------------------------------------|------------------------------------------------|--------------------|------------------------|--------------------------------------|-----------------------------|---------------------------------|-------------------------------|
| 1    | 11                              | 12               | F   | 5                                             | 11                                             | Seizures           | Complex focal seizures | No                                   | Yes                         | No                              | BRAF V600E mutation           |
| 2    | 14                              | 14               | F   | 2                                             | 4                                              | Headache           | -                      | No                                   | Yes (extensive)             | No                              | FGFR2-PASD1 fusion            |
| 3    | 6                               | 6                | M   | 14                                            | 16                                             | Seizures           | Complex focal seizures | No                                   | Yes                         | No                              | FGFR2-SHTN1 fusion            |
| 4    | 13                              | 10#              | F   | 145                                           | 131                                            | Seizures           | Complex focal seizures | No                                   | Yes (extensive)             | No                              | BRAF V600E mutation           |
| 5    | 9                               | 9                | M   | 63                                            | 64                                             | Headache           | -                      | No                                   | No                          | Yes                             | BRAF V600E mutation           |
| 6    | <1                              | 4                | F   | 46                                            | 48                                             | Seizures           | Simple focal seizures  | Yes*                                 | Yes                         | No                              | FGFR2 - INA, ATM fusion       |
| 7    | 6                               | 6                | M   | 0                                             | 0                                              | Seizures           | Complex focal seizures | No                                   | Yes                         | Yes                             | FGFR2 – INA fusion            |
| 8    | 14                              | 14               | M   | 2                                             | 2                                              | Seizures, Headache | Complex focal seizures | Yes*                                 | No                          | Yes                             | FGFR2 - CTNNA3 fusion         |
| 9    | <1                              | 2                | M   | 5                                             | 97                                             | Seizures           | Complex focal seizures | Yes*                                 | Yes                         | No                              | BRAF V600E mutation           |
| 10   | 9                               | 11               | F   | 65                                            | 92                                             | Seizures, Headache | Simple focal seizures  | No                                   | No                          | No                              | BRAF V600E mutation           |

FGFR2: Fibroblast growth factor receptor 2; BRAF: B-RAF proto-oncogene; SHTN1: Shootin 1; PASD1: PAS domain-containing protein 1; INA: Internexin Neuronal Intermediate Filament Protein Alpha; CTNNA3: Catenin Alpha 3; ATM: Ataxia-telangiectasia mutated.

\*Patients underwent surgical reintervention

#The patient was asymptomatic at the initial MRI.

**Supplementary Table 2:** Imaging features of pediatric PLNTY

| Case | Tumor location           | Tumor side | Cortical-subcortical location | Margins         | Morphology                      | Cysts (size mm) | Calcification | Calcification Pattern | Contrast Enhancement | Contrast Enhancement Pattern | ASL Perfusion   | T1w signal*  | T2w signal*  | T2 FLAIR signal* | TLS |
|------|--------------------------|------------|-------------------------------|-----------------|---------------------------------|-----------------|---------------|-----------------------|----------------------|------------------------------|-----------------|--------------|--------------|------------------|-----|
| 1    | Medial Temporal          | Left       | Yes                           | Ill-defined     | Solid and cystic                | Yes (1.8)       | Yes           | Punctate              | Yes                  | Mild and Nodular             | –               | Mixed        | Hyperintense | Hyperintense     | No  |
| 2    | Inferior Parietal        | Left       | No                            | Well-delineated | Solid and cystic                | Yes (17.2)      | Yes           | Chunky                | No                   | –                            | –               | Mixed        | Mixed        | Mixed            | No  |
| 3    | Postero-Lateral Temporal | Right      | Yes                           | Ill-defined     | Solid and cystic                | Yes (5.5)       | Yes           | Punctate              | Yes                  | Mild and Scarce              | Mildly Elevated | Hyperintense | Hyperintense | Hyperintense     | Yes |
| 4    | Occipital                | Right      | Yes                           | Ill-defined     | Solid and cystic (on follow-up) | Yes (3.2)       | Yes           | Chunky (eventually)   | No                   | –                            | –               | Hyperintense | Hyperintense | Hyperintense     | No  |
| 5    | Antero-Lateral Temporal  | Right      | No                            | Ill-defined     | Solid                           | No              | Yes           | Punctate              | Yes                  | Mild and Patchy              | Mildly Elevated | Hypointense  | Hyperintense | Hyperintense     | No  |
| 6    | Medial Parietal          | Left       | Yes                           | Ill-defined     | Solid and cystic                | Yes (3.1)       | Yes           | Chunky                | No                   | –                            | –               | Mixed        | Mixed        | Mixed            | Yes |
| 7    | Antero-Lateral Temporal  | Right      | Yes                           | Ill-defined     | Solid and cystic                | Yes (8.4)       | Yes           | Punctate              | Yes                  | Mild and Scarce              | –               | Isointense   | Hyperintense | Hyperintense     | No  |
| 8    | Postero-Lateral Temporal | Left       | Yes                           | Ill-defined     | Cystic                          | Yes (9.3)       | No            | –                     | No                   | –                            | –               | Hypointense  | Hyperintense | Mixed            | Yes |
| 9    | Medial Temporal          | Right      | Yes                           | Ill-defined     | Solid and cystic                | Yes (4.4)       | Yes           | Punctate              | No                   | –                            | –               | Isointense   | Hyperintense | Hyperintense     | Yes |
| 10   | Antero-inferior Temporal | Right      | Yes                           | Ill-defined     | Solid and Cystic                | Yes (8.7)       | No            | –                     | No                   | –                            | Low             | Isointense   | Hyperintense | Hyperintense     | No  |

ASL: Arterial spin label, TLS: Transmantle-like sign, \*: relative to normal cortical signal

**Supplementary Table 3:** WHO5 essential diagnostic criteria for PLNTY.

|                                                                                                       |
|-------------------------------------------------------------------------------------------------------|
| Diffuse growth pattern (at least regionally)                                                          |
| Few (if any) mitotic figures                                                                          |
| Oligodendroglioma-like morphology                                                                     |
| CD34 expression by tumor cells and by ramified neural cells in the associated cerebral cortex         |
| IDH-wildtype status                                                                                   |
| MAPK pathway driving genetic abnormalities (typically BRAF p.V600E mutations or FGFR2/FGFR3 fusions). |

WHO 5, 2021 5th edition of the World Health Organization Classification of Tumors of the Central Nervous System.

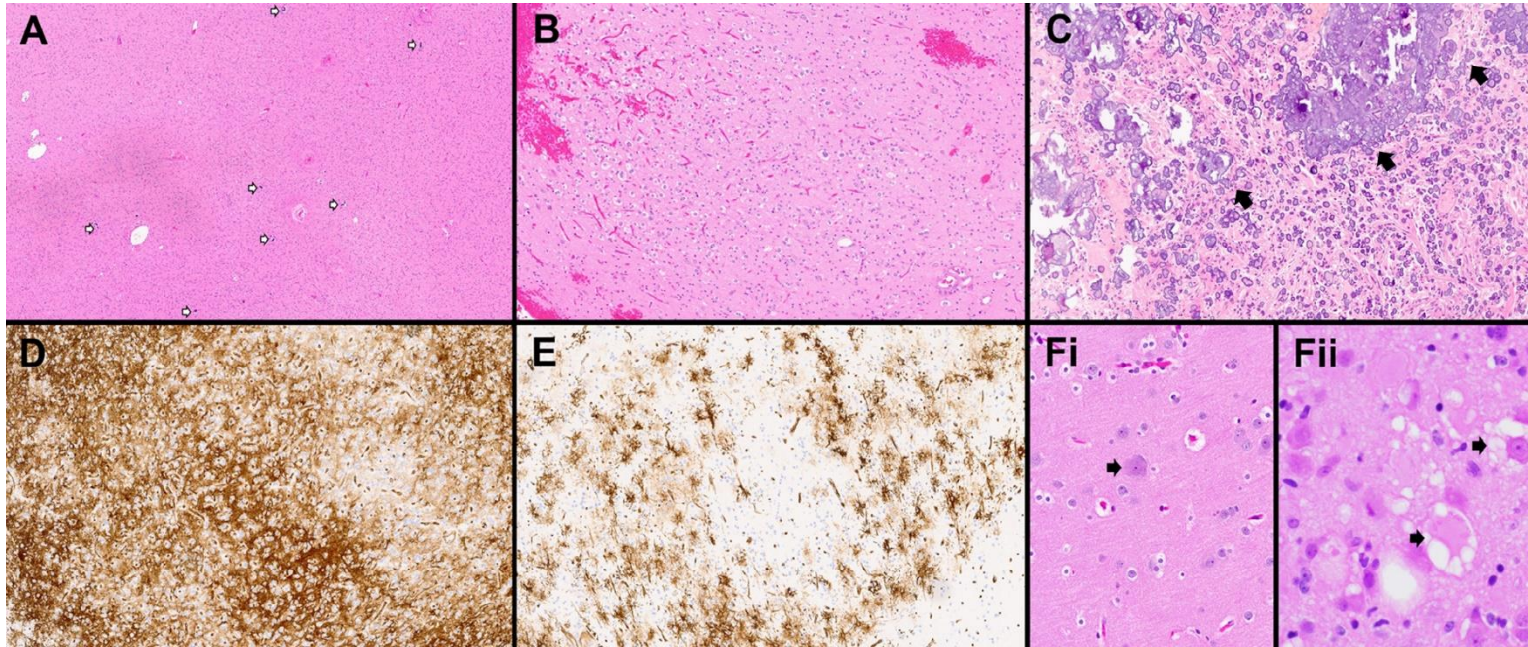

**Supplementary Figure 1.** Histopathology of PLNTY tumors. A: Lesion with diffuse growth and scattered microcalcifications (white arrows) at low magnification (H&E stain, 40x magnification). B: Focal oligodendroglial-like components with clear perinuclear halos (H&E stain, 100x magnification). C: An example of a tumor with widespread calcifications (black arrows) (H&E stain, 100x magnification). D: All cases exhibited diffuse CD34 staining (CD34 immunostaining, 100x magnification). E: Ramified CD34 staining is observed in the cortex adjacent to the tumor (CD34 immunostaining, 100x magnification). F: In a subset of cases, dysmorphic neurons (black arrows) were detected in the cortex near the tumor, characterized by their large size, abnormally clustered Nissl substance, and occasional cytoplasmic vacuoles (Fi: H&E stain, 200x magnification; Fii: H&E stain, 400x magnification), indicating the presence of adjacent cortical dysplasia.

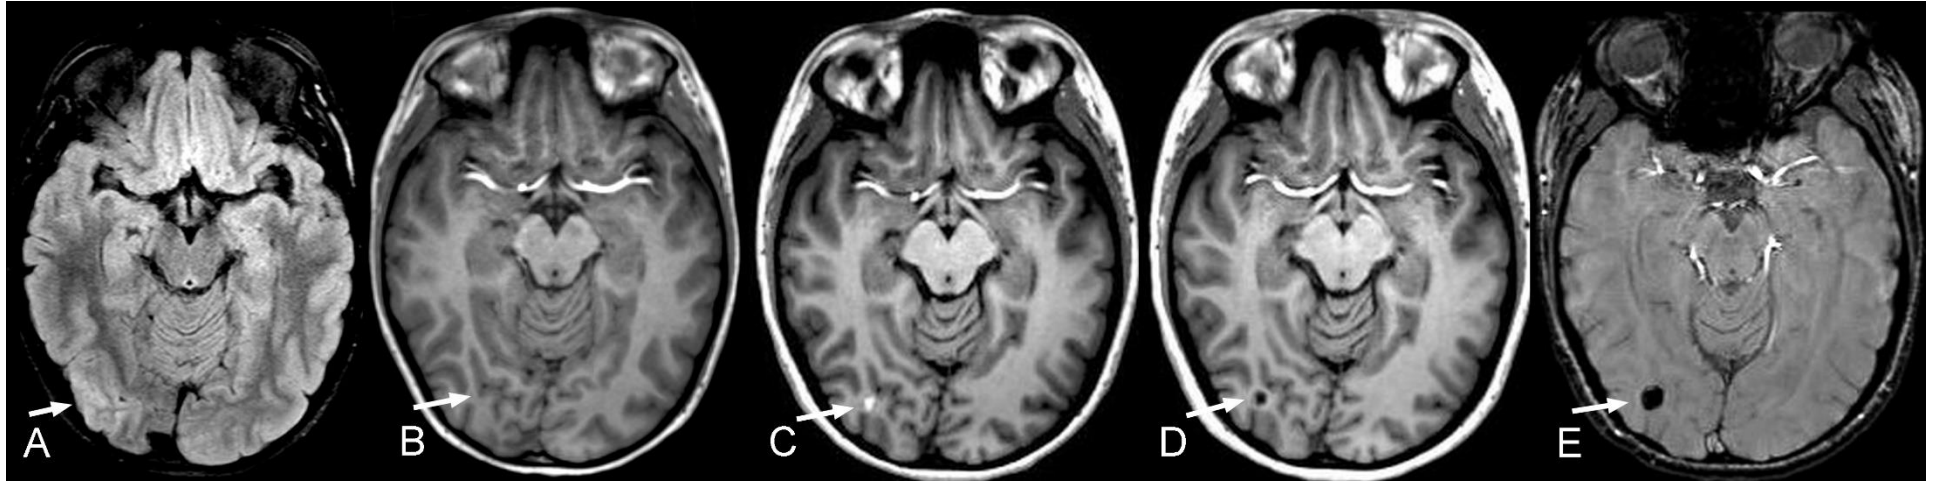

**Supplementary Figure 2.** A 10-year-old female (case 4) presented with head trauma. (A) Axial FLAIR sequence shows a faint, ill-defined high signal intensity area in the right occipital lobe (arrow), warranting follow-up. (B) Non-contrast axial T1WI showed no corresponding signal abnormalities. The patient was lost to follow-up and returned years later with seizures, managed medically. (C) Non-contrast axial T1WI reveals a new high T1 signal intensity focus within the same site as the initial FLAIR signal abnormality (arrow). (D) Non-contrast axial T1WI performed 2 years later, prior to surgery, displays a focal hypointense signal abnormality in the same region (arrow). (E) Axial SWI sequence shows a corresponding susceptibility (arrow), indicating the formation of a coarse central calcification over time.
